# Supplementary material for: A Genetic Basis for a Postmeiotic X Versus Y Chromosome Intragenomic Conflict in the Mouse
Source: PubMed Central journal article supplement (PMC3441658; doi:10.1371/journal.pgen.1002900), 2012-09-13
Supplement: pgen.1002900.s005.pdf [file pgen.1002900.s005.pdf]

## Figure S5

This table shows all genes found to be 1.5fold regulated in shSLX1 relative to wild type, with an FDR corrected p value < 0.05  
The rightmost columns indicate:

- 1) Whether the magnitude of the log ratio to WT was lower in shSLX1shSLY than in shSLX1 (i.e. correction of the de-regulation)
- 2) If so, whether the difference between shSLX1shSLY and shSLX1 had an FDR corrected p value < 0.05

| SYMBOL        | shSLX1     |       | shSLX1shSLY |           | Annotation  |           |      | Correction |     |
|---------------|------------|-------|-------------|-----------|-------------|-----------|------|------------|-----|
|               | Log2_ratio | p(XY) | Log2_ratio  | p(shSLX1) | SEARCH_KEY  | entrez_id | Chr. | Mag        | Sig |
| Aox4          | 1,227      | 0,000 | 0,043       | 0,000     | ILMN_222582 | 71872     | 1    | Y          | Y   |
| Atp6v1h       | 0,860      | 0,000 | 0,264       | 0,000     | ILMN_221485 | 108664    | 1    | Y          | Y   |
| Fam178b       | -0,656     | 0,000 | -0,803      | 0,886     | ILMN_217514 | 381337    | 1    | N          | -   |
| Fhl2          | 0,618      | 0,001 | 0,055       | 0,002     | ILMN_186128 | 14200     | 1    | Y          | Y   |
| LOC100043347  | 0,671      | 0,000 | -0,161      | 0,000     | ILMN_215832 | 100043347 | 1    | Y          | Y   |
| Slamf9        | 1,104      | 0,000 | -0,148      | 0,000     | ILMN_215754 | 98365     | 1    | Y          | Y   |
| 1110008P14Rik | 0,648      | 0,005 | 0,520       | 1,000     | ILMN_216202 | 73737     | 2    | Y          | N   |
| 1700058C13Rik | 0,648      | 0,000 | -0,005      | 0,001     | ILMN_222471 | 73388     | 2    | Y          | Y   |
| Agpat2        | 0,632      | 0,001 | -0,160      | 0,000     | ILMN_217418 | 67512     | 2    | Y          | Y   |
| Angptl2       | 0,632      | 0,017 | -0,078      | 0,024     | ILMN_202070 | 26360     | 2    | Y          | Y   |
| Bmp7          | 1,251      | 0,000 | -0,066      | 0,000     | ILMN_202602 | 12162     | 2    | Y          | Y   |
| Col20a1       | 0,786      | 0,000 | 0,093       | 0,000     | ILMN_209312 | 73368     | 2    | Y          | Y   |
| Ctdspl2       | 0,702      | 0,000 | 0,021       | 0,000     | ILMN_197409 | 329506    | 2    | Y          | Y   |
| Defb21        | 1,355      | 0,000 | -0,462      | 0,000     | ILMN_217555 | 403172    | 2    | Y          | Y   |
| Lcn2          | 0,626      | 0,000 | 0,104       | 0,002     | ILMN_219674 | 16819     | 2    | Y          | Y   |
| Nudt5         | 1,473      | 0,000 | 0,094       | 0,000     | ILMN_213908 | 53893     | 2    | Y          | Y   |
| Rapgef4       | 0,723      | 0,000 | 0,063       | 0,001     | ILMN_213156 | 56508     | 2    | Y          | Y   |
| Chi3l3        | 1,692      | 0,000 | 0,034       | 0,000     | ILMN_226085 | 12655     | 3    | Y          | Y   |
| Chi3l4        | 1,315      | 0,000 | -0,152      | 0,000     | ILMN_196569 | 104183    | 3    | Y          | Y   |
| Dennd4b       | -0,715     | 0,044 | -0,396      | 0,030     | ILMN_184356 | 229541    | 3    | Y          | Y   |
| Larp1b        | 0,959      | 0,000 | 0,093       | 0,000     | ILMN_216009 | 214048    | 3    | Y          | Y   |
| Lrriq3        | 0,640      | 0,049 | 0,391       | 0,365     | ILMN_202332 | 74435     | 3    | Y          | N   |
| Tmod4         | 1,857      | 0,000 | -0,370      | 0,000     | ILMN_186822 | 50874     | 3    | Y          | Y   |
| Ambp          | 0,906      | 0,000 | 0,116       | 0,008     | ILMN_218973 | 11699     | 4    | Y          | Y   |

|               |        |       |        |       |             |           |   |   |   |
|---------------|--------|-------|--------|-------|-------------|-----------|---|---|---|
| BC055111      | 0,715  | 0,048 | 0,324  | 0,787 | ILMN_215845 | 242602    | 4 | Y | N |
| Cela2a        | 0,612  | 0,000 | -0,082 | 0,000 | ILMN_216734 | 13706     | 4 | Y | Y |
| Guca2a        | 1,211  | 0,000 | -0,320 | 0,000 | ILMN_213266 | 14915     | 4 | Y | Y |
| Ppap2b        | 1,079  | 0,000 | -0,056 | 0,000 | ILMN_212849 | 67916     | 4 | Y | Y |
| Abcb1b        | 0,606  | 0,000 | -0,021 | 0,000 | ILMN_212008 | 18669     | 5 | Y | Y |
| Gnrhr         | 0,696  | 0,000 | 0,156  | 0,001 | ILMN_185817 | 14715     | 5 | Y | Y |
| Hgfac         | 0,800  | 0,000 | 0,093  | 0,000 | ILMN_218356 | 54426     | 5 | Y | Y |
| Myl2          | 1,514  | 0,000 | -0,021 | 0,000 | ILMN_224025 | 17906     | 5 | Y | Y |
| 4933413G19Rik | 0,851  | 0,006 | 0,090  | 0,052 | ILMN_189726 | 71149     | 6 | Y | N |
| Hipk2         | 0,600  | 0,001 | -0,001 | 0,001 | ILMN_201896 | 15258     | 6 | Y | Y |
| St3gal5       | 0,602  | 0,002 | -0,140 | 0,000 | ILMN_219818 | 20454     | 6 | Y | Y |
| Actn4         | 0,915  | 0,001 | -0,394 | 0,000 | ILMN_212299 | 60595     | 7 | Y | Y |
| Cyp2a12       | 0,885  | 0,002 | -0,103 | 0,000 | ILMN_214236 | 13085     | 7 | Y | Y |
| Klk1          | 1,500  | 0,000 | 0,867  | 0,101 | ILMN_196747 | 16612     | 7 | Y | N |
| Klk1b26       | 1,752  | 0,000 | 2,249  | 0,377 | ILMN_196712 | 16618     | 7 | N | - |
| Klk1b4        | 0,815  | 0,000 | 0,077  | 0,000 | ILMN_199361 | 18048     | 7 | Y | Y |
| Klk1b5        | 1,590  | 0,000 | 0,773  | 0,016 | ILMN_196768 | 16622     | 7 | Y | Y |
| Klk1b9        | 1,020  | 0,005 | 1,046  | 0,544 | ILMN_196709 | 13648     | 7 | N | - |
| Lilra6        | 0,762  | 0,000 | -0,100 | 0,000 | ILMN_201549 | 18726     | 7 | Y | Y |
| Mettl9        | 0,771  | 0,001 | 0,335  | 0,476 | ILMN_219776 | 59052     | 7 | Y | N |
| Pira2         | 1,197  | 0,000 | 0,019  | 0,000 | ILMN_189324 | 18725     | 7 | Y | Y |
| Shank2        | 0,810  | 0,000 | 0,212  | 0,056 | ILMN_211643 | 210274    | 7 | Y | N |
| Ccl17         | 0,655  | 0,004 | 0,021  | 0,003 | ILMN_220052 | 20295     | 8 | Y | Y |
| Col4a2        | 0,994  | 0,000 | -0,006 | 0,000 | ILMN_216595 | 12827     | 8 | Y | Y |
| F10           | 0,687  | 0,000 | 0,036  | 0,033 | ILMN_217890 | 14058     | 8 | Y | Y |
| Fam70b        | 0,779  | 0,000 | -0,092 | 0,000 | ILMN_198849 | 272465    | 8 | Y | Y |
| Jund          | -0,766 | 0,000 | 0,404  | 0,000 | ILMN_217403 | 16478     | 8 | Y | Y |
| LOC100045280  | 0,817  | 0,020 | 0,049  | 0,034 | ILMN_203136 | 100045280 | 8 | Y | Y |
| Plcg2         | 0,625  | 0,020 | -0,074 | 0,000 | ILMN_210061 | 234779    | 8 | Y | Y |
| Rnf170        | 0,810  | 0,000 | -0,371 | 0,000 | ILMN_187098 | 77733     | 8 | Y | Y |
| Tnfsf13b      | 0,762  | 0,000 | 0,141  | 0,000 | ILMN_184661 | 24099     | 8 | Y | Y |
| 1700019J19Rik | 1,014  | 0,000 | -0,183 | 0,000 | ILMN_221740 | 76412     | 9 | Y | Y |
| Cmc1          | 0,723  | 0,003 | -0,201 | 0,000 | ILMN_192959 | 67899     | 9 | Y | Y |
| Fxyd2         | 0,590  | 0,001 | 0,089  | 0,048 | ILMN_224097 | 11936     | 9 | Y | Y |
| Myl3          | 0,880  | 0,003 | 0,134  | 0,010 | ILMN_218112 | 17897     | 9 | Y | Y |
| Ntm           | 0,632  | 0,004 | -0,215 | 0,001 | ILMN_184137 | 235106    | 9 | Y | Y |

|               |        |       |        |       |             |           |    |   |   |
|---------------|--------|-------|--------|-------|-------------|-----------|----|---|---|
| Pstpip1       | 0,710  | 0,000 | -0,273 | 0,000 | ILMN_215958 | 19200     | 9  | Y | Y |
| Usp3          | 0,836  | 0,000 | 0,493  | 0,733 | ILMN_190457 | 235441    | 9  | Y | N |
| Gm1552        | 0,687  | 0,000 | -0,071 | 0,000 | ILMN_199038 | 380640    | 10 | Y | Y |
| LOC100044873  | 0,829  | 0,000 | 0,045  | 0,001 | ILMN_215989 | 100044873 | 10 | Y | Y |
| Prep          | 0,653  | 0,012 | 0,059  | 0,014 | ILMN_202422 | 19072     | 10 | Y | Y |
| Ube2g2        | 0,720  | 0,000 | -0,092 | 0,000 | ILMN_188977 | 22213     | 10 | Y | Y |
| Aatf          | 0,654  | 0,001 | -0,218 | 0,000 | ILMN_212076 | 56321     | 11 | Y | Y |
| Arrb2         | 0,924  | 0,000 | -0,066 | 0,000 | ILMN_218837 | 216869    | 11 | Y | Y |
| B3gnt1        | 0,698  | 0,000 | -0,257 | 0,000 | ILMN_208620 | 210004    | 11 | Y | Y |
| Ccdc57        | 0,772  | 0,000 | 0,076  | 0,000 | ILMN_223765 | 71276     | 11 | Y | Y |
| Ccl5          | 0,682  | 0,018 | 0,046  | 0,017 | ILMN_212715 | 20304     | 11 | Y | Y |
| Fbl1          | 0,690  | 0,003 | 0,346  | 0,456 | ILMN_199174 | 237730    | 11 | Y | N |
| LOC100044934  | 0,761  | 0,000 | -0,082 | 0,000 | ILMN_221227 | 100044934 | 11 | Y | Y |
| LOC100045019  | 0,649  | 0,000 | -0,195 | 0,000 | ILMN_195453 | 100045019 | 11 | Y | Y |
| Tmem11        | 0,612  | 0,000 | -0,261 | 0,000 | ILMN_214265 | 216821    | 11 | Y | Y |
| Zmat5         | 1,138  | 0,000 | -0,311 | 0,000 | ILMN_218036 | 67178     | 11 | Y | Y |
| 4933437F05Rik | 0,875  | 0,000 | 0,536  | 0,745 | ILMN_220294 | 71275     | 12 | Y | N |
| Serpina1d     | 0,834  | 0,000 | -0,118 | 0,000 | ILMN_222172 | 20703     | 12 | Y | Y |
| 0610007P08Rik | 0,716  | 0,000 | -0,017 | 0,000 | ILMN_201703 | 76251     | 13 | Y | Y |
| LOC100046232  | 1,215  | 0,000 | -0,147 | 0,000 | ILMN_209434 | 100046232 | 13 | Y | Y |
| Nqo2          | 0,730  | 0,002 | 0,130  | 0,116 | ILMN_208782 | 18105     | 13 | Y | N |
| Pom121l2      | -0,608 | 0,025 | -0,572 | 1,000 | ILMN_197161 | 195236    | 13 | Y | N |
| Pou6f2        | 1,346  | 0,000 | 0,290  | 0,000 | ILMN_204071 | 218030    | 13 | Y | Y |
| Tgfb1         | 1,084  | 0,000 | -0,110 | 0,000 | ILMN_192154 | 21810     | 13 | Y | Y |
| Fhit          | 1,189  | 0,000 | 0,275  | 0,000 | ILMN_222375 | 14198     | 14 | Y | Y |
| Fndc3a        | 1,104  | 0,000 | -0,774 | 0,000 | ILMN_188804 | 319448    | 14 | Y | Y |
| Gulo          | 1,228  | 0,002 | -0,025 | 0,001 | ILMN_212949 | 268756    | 14 | Y | Y |
| Fam186a       | -0,594 | 0,001 | -0,625 | 1,000 | ILMN_197658 | 380973    | 15 | N | - |
| Gsdmd         | 0,908  | 0,000 | -0,036 | 0,000 | ILMN_222389 | 69146     | 15 | Y | Y |
| Hoxc9         | 0,940  | 0,000 | 0,446  | 0,046 | ILMN_223992 | 15427     | 15 | Y | Y |
| Nfe2          | 0,667  | 0,000 | -0,077 | 0,000 | ILMN_220449 | 18022     | 15 | Y | Y |
| Efcab1        | 0,732  | 0,000 | 0,691  | 1,000 | ILMN_216541 | 66793     | 16 | Y | N |
| Stfa1         | 1,870  | 0,000 | 0,066  | 0,000 | ILMN_245739 | 20861     | 16 | Y | Y |
| 4930583I09Rik | 1,018  | 0,000 | 0,029  | 0,000 | ILMN_219612 | 78057     | 17 | Y | Y |
| Strn          | 0,938  | 0,000 | 0,037  | 0,000 | ILMN_184393 | 268980    | 17 | Y | Y |
| Tff2          | 0,601  | 0,020 | -0,094 | 0,004 | ILMN_216698 | 21785     | 17 | Y | Y |

|                  |        |       |        |       |             |           |    |   |   |             |
|------------------|--------|-------|--------|-------|-------------|-----------|----|---|---|-------------|
| Thbs2            | 1,011  | 0,000 | -0,187 | 0,000 | ILMN_213253 | 21826     | 17 | Y | Y |             |
| Arhgap26         | 0,941  | 0,000 | -0,001 | 0,000 | ILMN_201922 | 71302     | 18 | Y | Y |             |
| St8sia5          | 0,768  | 0,000 | 0,053  | 0,000 | ILMN_218246 | 225742    | 18 | Y | Y |             |
| Acs15            | 0,945  | 0,029 | -0,161 | 0,029 | ILMN_189230 | 433256    | 19 | Y | Y |             |
| AK076554         | 0,762  | 0,000 | -0,195 | 0,000 | ILMN_206634 | 208449    | 19 | Y | Y |             |
| Gpr120           | 1,099  | 0,000 | -0,101 | 0,000 | ILMN_222251 | 107221    | 19 | Y | Y |             |
| Pold4            | 0,793  | 0,000 | -0,319 | 0,000 | ILMN_233673 | 69745     | 19 | Y | Y |             |
| Rps6ka4          | -0,718 | 0,001 | -0,583 | 1,000 | ILMN_221814 | 56613     | 19 | Y | N |             |
| Dusp21           | -0,606 | 0,034 | 0,296  | 0,001 | ILMN_222304 | 73547     | X  | Y | Y |             |
| Gm14525          | -0,800 | 0,048 | 0,285  | 0,038 | ILMN_192739 | 100039120 | X  | Y | Y | = Six/Six11 |
| Gm14594          | -1,120 | 0,000 | -0,373 | 0,338 | ILMN_224045 | 666096    | X  | Y | N | = Six/Six11 |
| Gm5168           | -1,001 | 0,000 | -0,477 | 1,000 | ILMN_232052 | 382275    | X  | Y | N | = Six/Six11 |
| Gm5935           | -0,861 | 0,003 | -0,618 | 1,000 | ILMN_235895 | 546282    | X  | Y | N | = Six/Six11 |
| LOC382213        | -1,212 | 0,000 | -0,826 | 1,000 | ILMN_200813 |           | X  | Y | N | = Six/Six11 |
| mt-Nd5           | 0,969  | 0,018 | 0,750  | 1,000 | ILMN_194230 | 17721     | MT | Y | N |             |
| AK039094         | 0,732  | 0,000 | -0,233 | 0,000 | ILMN_204680 |           |    | Y | Y |             |
| Cgef2-pending    | 0,642  | 0,000 | 0,246  | 0,078 | ILMN_201828 |           |    | Y | N |             |
| LOC236371        | 0,715  | 0,000 | 0,301  | 0,012 | ILMN_199291 |           |    | Y | Y |             |
| scl0001883.1_112 | 0,670  | 0,000 | 0,054  | 0,000 | ILMN_193472 |           |    | Y | Y |             |

115 111 91
